# Supplementary material
Source: PubMed Central journal article supplement (PMC2536758)
Supplement: NIHMS49138-supplement-suff_fig_1.pdf [file NIHMS49138-supplement-suff_fig_1.pdf]

## gp33

|          |                                      |    |  |     |          |
|----------|--------------------------------------|----|--|-----|----------|
|          |                                      | 80 |  | 100 |          |
| T4       | FAKFIPSGIIEKIQSEADENLLRPSVVRCEKTN    |    |  |     | FLDFLL   |
| RB69     | *****T**V**T*****M*****A**G****      |    |  |     | FLDFLL   |
| RB49     | YQ*Y**VS**D**TQ*C*VNRT**KG*IDEPTN    |    |  |     | FLDI     |
| phi-1    | YQ*Y**VS**D**TQ*C*VNRT**KG*IDEPTN    |    |  |     | FLDI     |
| RB43     | LN*TV*KAA**D**SD***KN*****AKDHTTTC   |    |  |     | FLDDEFM  |
| RB16     | LN***KA**D**SD***KN*****AKDHTTTC     |    |  |     | FLDDEFM  |
| 133      | YQRYL*TS***A**KL***E**R*VA**M*NYHQSA |    |  |     | FLDFILNA |
|          |                                      |    |  |     |          |
| Aeh1     | IP***YPALRD**EE*G*ECRTVKPETHNA       |    |  |     | FLAFLF   |
| 44RR2.8t | CQ*Y**RAL*D*LSQ*C*ESDM****I**SMTRN   |    |  |     | FLDFLM   |
| 25       | CH*Y**RAV*D*LSK*CV*SDM****IAKSMTRN   |    |  |     | FLDFLM   |
| 65       | VS*L*SKPLK**LKFD*QKL*FMKTSRA         |    |  |     | FLMLV    |
| KVP40    | *PYL*NQTLRD**ET***N*KTI*SRFGSA       |    |  |     | FLDGLQW  |
| nt-1     | *PYL*NQTLKD**ET***N*KTI*SRFGSS       |    |  |     | FLDLG    |
| JS98     | **RYL*AG**D**MN***D*****MA*TQKTN     |    |  |     | FLDFLL   |

## gp55

|         |                            |     |  |     |                   |
|---------|----------------------------|-----|--|-----|-------------------|
|         |                            | 150 |  | 170 |                   |
| T4      | DDDMVALVDETFIQDIYDKMTHYEES |     |  |     | TYRTPGAEKKS       |
| RB69    | *****A**KA*****E**S**      |     |  |     | SLDFLY*DDN        |
| RB49    | *A**CQIA**A*****INN***     |     |  |     | VNKPAPKVEDVLTEELF |
| phi-1   | *A**CQIA**A*****INN***     |     |  |     | VNKPAPKVEDVLTEELF |
| Rb43    | *T**T*IA*****H**LNQ***     |     |  |     | AKKPKDKIEVDESP    |
| RB16    | *A**TSIA*****H**LNQ***     |     |  |     | AKKPKDKIEVDESP    |
| 133     | *PE*ASMA**D*****QKF**T*    |     |  |     | LNKKANNQIENLPDTS  |
|         |                            |     |  |     |                   |
| Aeh1    | *E**AK***VA*YN*MMT*ANDF*AK |     |  |     | RKIKPKPKQLGGLS    |
| 44RR2.8 | *S**SRIA**G*****H**LVV**A* |     |  |     | IKSKKDKPELPI      |
| 25      | ***SR***N*****HG*LVA***S*  |     |  |     | LKSKKDKEDVPI      |
| 65      | *E**GEM**PD*YL*LV**VSS**** |     |  |     | VKKKQKDKDEDIGE    |
| KVP40   | YTVEGEE*TFE*L*QMLERVNS**SG |     |  |     | KTAKAQPEQKEPL     |
| nt-1    | M*GE--EA*YE*L*QMLE*VNS**T* |     |  |     | KKDKAQPEKNEPI     |
| JS98    | *****GIA*****Q**T*         |     |  |     | LVKAPGSKSAESKVG   |

Supplementary figure 1
