# Supplementary material
Source: PubMed Central journal article supplement (PMC2536758)

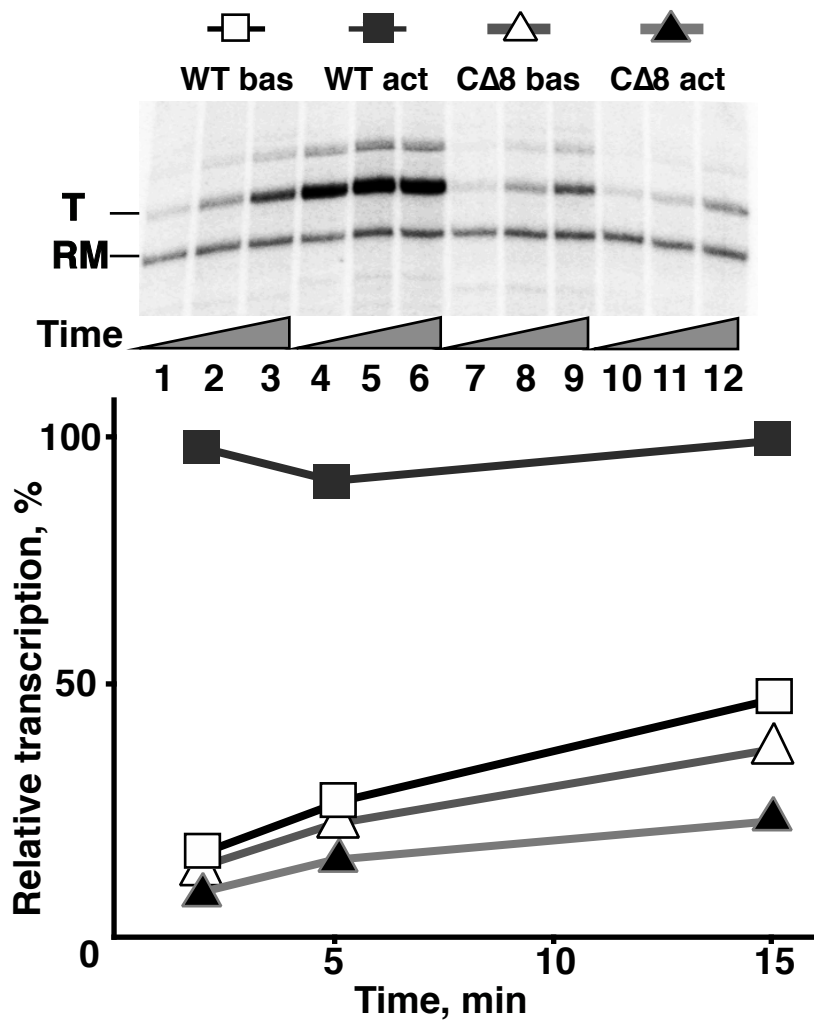

Supplementary figure 3

Supplement: NIHMS49138-supplement-sugg_fig_3.pdf [file NIHMS49138-supplement-sugg_fig_3.pdf]

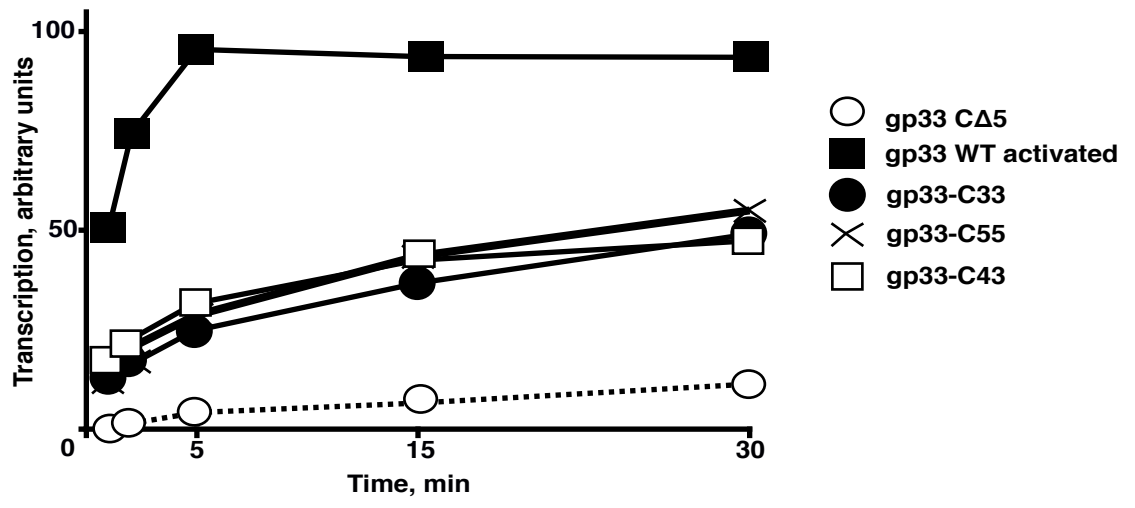

Supplementary figure 2

Supplement: NIHMS49138-supplement-supp_fig_2.pdf [file NIHMS49138-supplement-supp_fig_2.pdf]

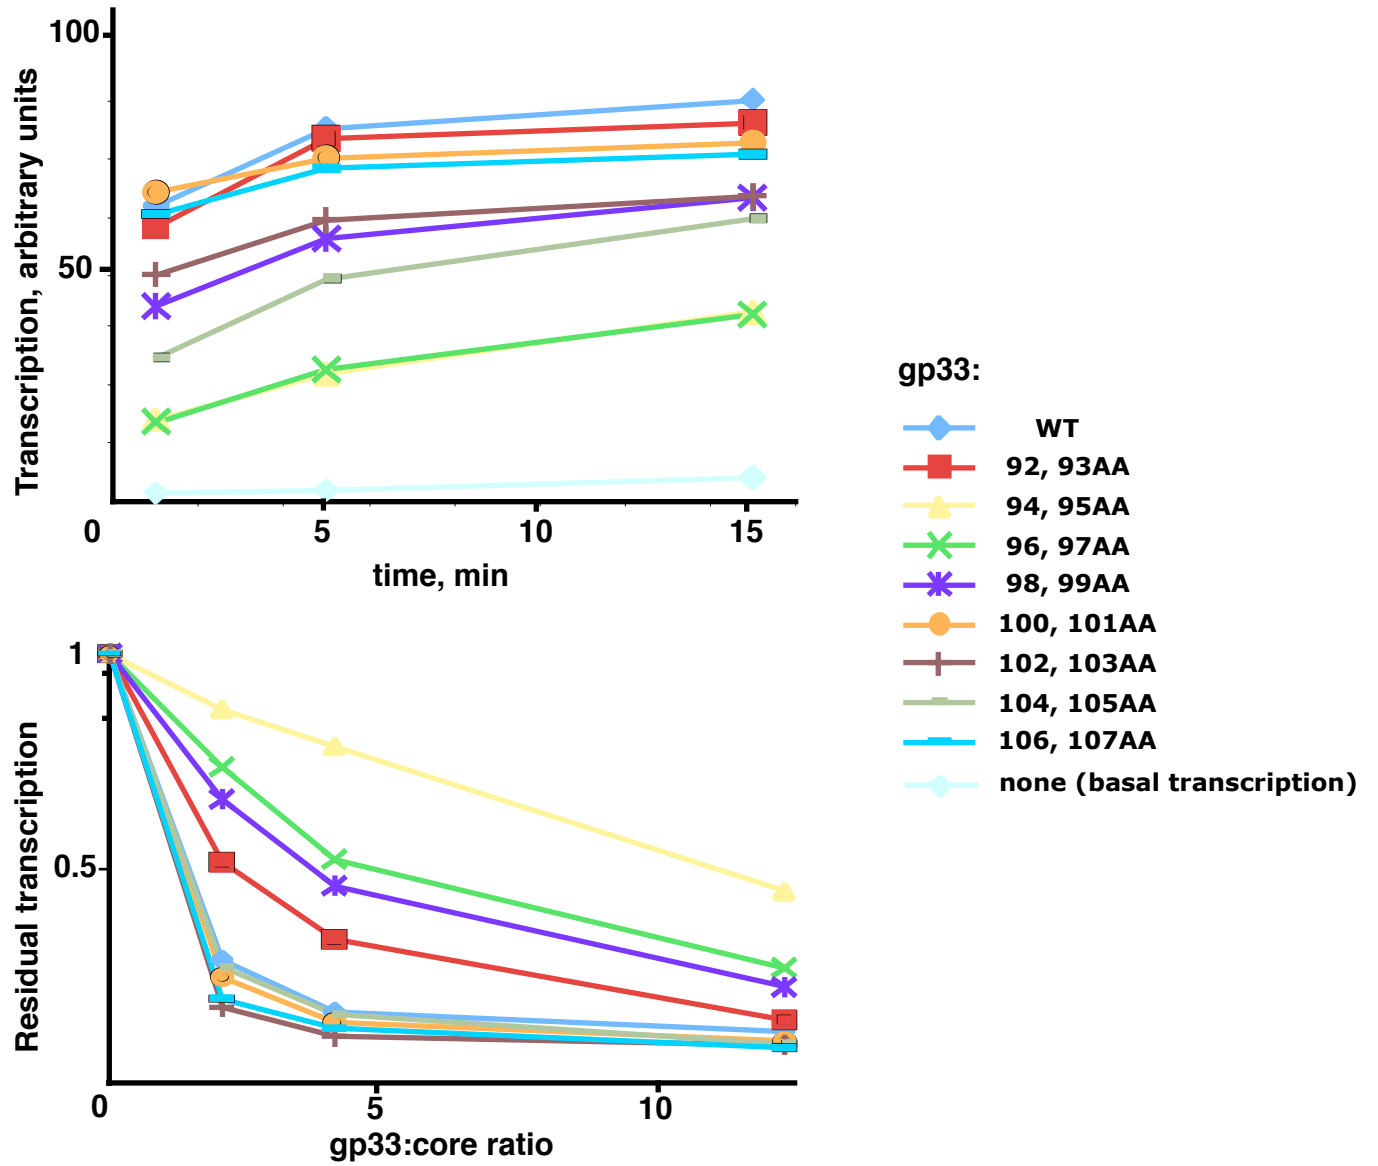

Supplementary figure 4

Supplement: NIHMS49138-supplement-supp_fig_4.pdf [file NIHMS49138-supplement-supp_fig_4.pdf]

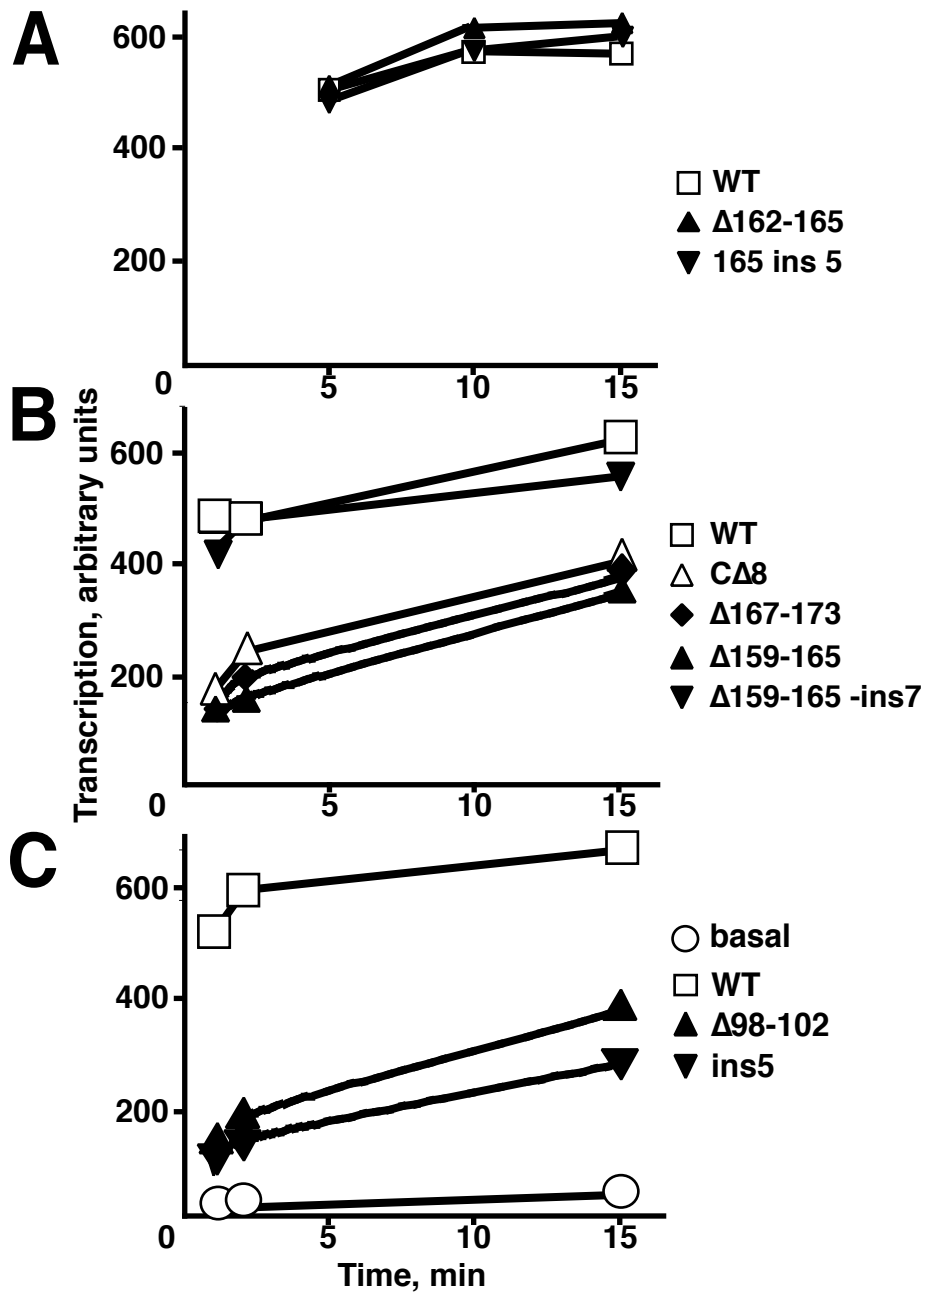

Supplementary figure 5

Supplement: NIHMS49138-supplement-supp_fig_5.pdf [file NIHMS49138-supplement-supp_fig_5.pdf]

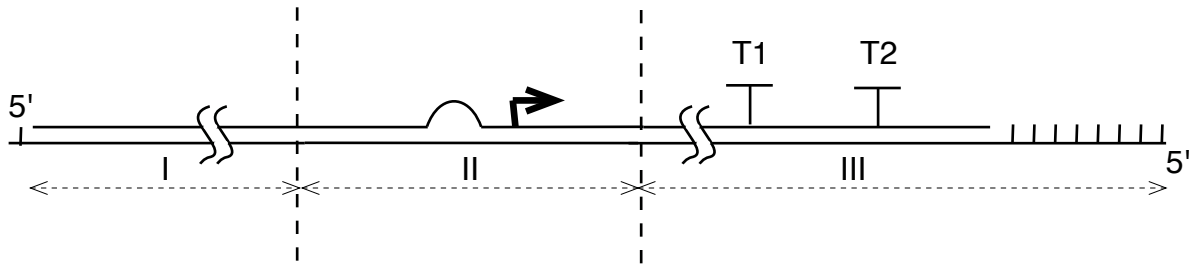

| Condition | B  | A | B  | A | B                 | A | B | A | B  | A |
|-----------|----|---|----|---|-------------------|---|---|---|----|---|
| Ligase    | +  |   | -  |   | +                 |   | + |   | +  |   |
| I+III     | +  |   | +  |   | +                 |   | + |   | -  |   |
| II        | DS |   | DS |   | <sup>-13/-8</sup> |   | - |   | DS |   |

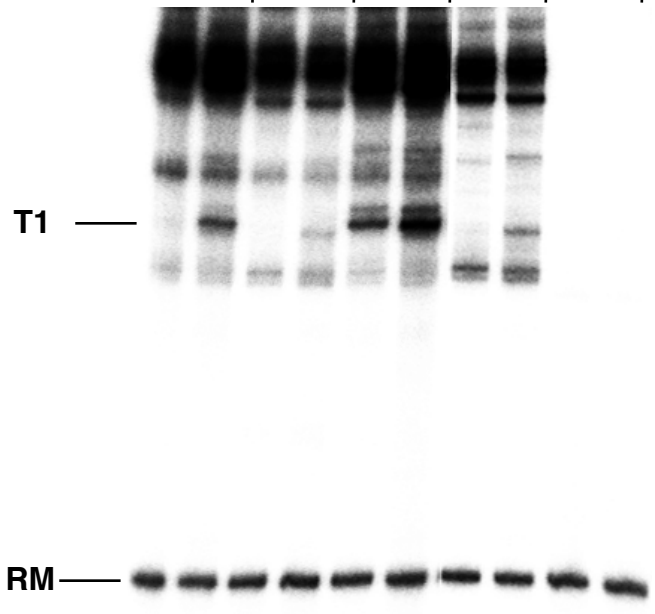

Supplementary figure 6

Supplement: NIHMS49138-supplement-supp_fig_6.pdf [file NIHMS49138-supplement-supp_fig_6.pdf]
